# Supplementary material for: Mutation in the 26S proteasome regulatory subunit rpn2 gene in Plasmodium falciparum confers resistance to artemisinin
Source: PubMed Central journal article supplement (PMC10884193; doi:10.3389/fcimb.2024.1342856), 2024-02-09

**Supplementary Figure 1:** Cloning strategy to obtain a *Plasmodium spp.* interspecies chimeric *rpn2* gene.

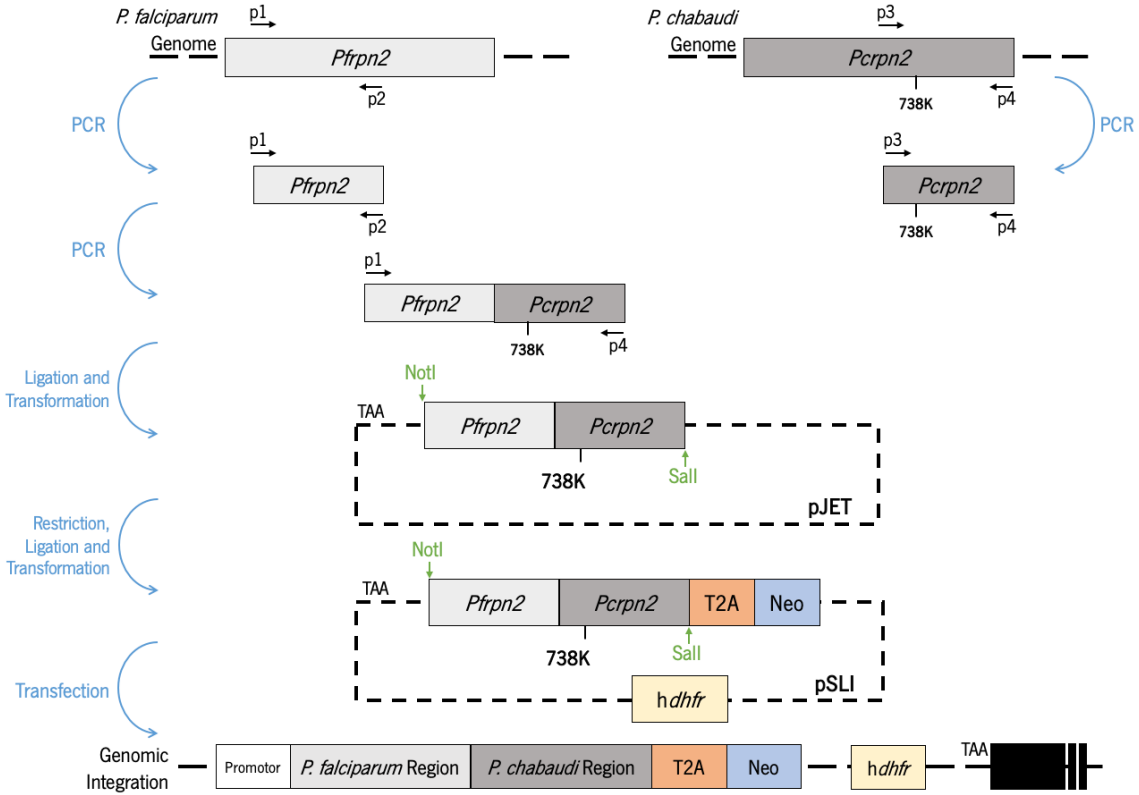

Supplement: Image_1.pdf [file Image_1.pdf]
