# Supplementary material for: Mutation in the 26S proteasome regulatory subunit rpn2 gene in Plasmodium falciparum confers resistance to artemisinin
Source: PubMed Central journal article supplement (PMC10884193; doi:10.3389/fcimb.2024.1342856), 2024-02-09
Supplement: Image_2.pdf [file Image_2.pdf]

**Supplementary Figure 2: Protein sequence alignment between *P. chabaudi* rpn2, *P. falciparum* rpn2 and chimeric rpn2.**

|               |                                                                                                                                                                                                                |      |
|---------------|----------------------------------------------------------------------------------------------------------------------------------------------------------------------------------------------------------------|------|
| Consensus     | MRFENQFSKHDIVTSASGVIALNNEEETSCLKLFGLEKLNLAIVDVYWPPELADSIKIEELCEDEDFVGRELANLLASKIYFHLEKYSEALKYALCAGKLFNIKEKSQYVETMLAKCIEKYVEIREMOYD-----IDYN-----NQHNI-----NDGITNNN-----DIFNAY-----NN                           | 153  |
| pcRPN2        | MDVEKTIHENDIVTSASGVIALNNEEETSCLKLFGLEKLNLAIVDVYWPPELADSIKIEELCEDEDFVGRELANLLASKIYFHLEKYSEALKYALCAGKLFNIKEKSQYVETMLAKCIEKYVEIREMOYD-----IDYN-----NQHNI-----NDGITNNN-----DIFNAY-----NN                           | 207  |
| pfRPN2        | MRFENQFSKHDIVTSASGVIALNNEEETSCLKLFGLEKLNLAIVDVYWPPELADSIKIEELCEDEDFVGRELANLLASKIYFHLEKYSEALKYALCAGKLFNIKEKSQYVETMLAKCIEKYVEIREMOYD-----IDYN-----NQHNI-----NDGITNNN-----DIFNAY-----NN                           | 153  |
| chimeric_RPN2 | MRFENQFSKHDIVTSASGVIALNNEEETSCLKLFGLEKLNLAIVDVYWPPELADSIKIEELCEDEDFVGRELANLLASKIYFHLEKYSEALKYALCAGKLFNIKEKSQYVETMLAKCIEKYVEIREMOYD-----IDYN-----NQHNI-----NDGITNNN-----DIFNAY-----NN                           | 153  |
| Consensus     | NDLVELNSHNELLNKETDIFRFDINNEINQRMELLVDEMDVCIKSNDIKEALGVLDARRLDKVEYIIANAENKIEILAHNSINNEKHNMNKSFRNEYFKLLVNLVLSLSEELKTEYINLCECLYIIDDYKVAEILKLLHNYHLMAYQISFDLVDVFENKIFLRNLIQIENLQNKAYYFGEYFVTTPOEENNDADNKENE        | 360  |
| pcRPN2        | NHLFSRDNENDKVKENNIKDKDNNINNKMETFVDMLEICIKNNSIKEALGVLDARRLDKVEYIIANAENKIEILAHNSINNEKHNMNKSFRNEYFKLLVNLVLSLSEELKTEYINLCECLYIIDDYKVAEILKLLHNYHLMAYQISFDLVDVFENKIFLRNLIQIENLQNKAYYFGEYFVTTPOEENNDADNKENE           | 409  |
| pfRPN2        | NDLVELNSHNELLNKETDIFRFDINNEINQRMELLVDEMDVCIKSNDIKEALGVLDARRLDKVEYIIANAENKIEILAHNSINNEKHNMNKSFRNEYFKLLVNLVLSLSEELKTEYINLCECLYIIDDYKVAEILKLLHNYHLMAYQISFDLVDVFENKIFLRNLIQIENLQNKAYYFGEYFVTTPOEENNDADNKENE        | 360  |
| chimeric_RPN2 | NDLVELNSHNELLNKETDIFRFDINNEINQRMELLVDEMDVCIKSNDIKEALGVLDARRLDKVEYIIANAENKIEILAHNSINNEKHNMNKSFRNEYFKLLVNLVLSLSEELKTEYINLCECLYIIDDYKVAEILKLLHNYHLMAYQISFDLVDVFENKIFLRNLIQIENLQNKAYYFGEYFVTTPOEENNDADNKENE        | 360  |
| Consensus     | SNAIITNEQQDENNNEKEDKDNNDGKNPEHNDNNKPNDLTNDEPTYNNDDKAINDGNDNNDNNNNNNNNNNIIVEDVLKYISKKHIFYNKMKLLYILTGVKVTGNLYIEFLHRNHADLILLDTYKNIIVDSRSSITHHGIVIAHALMQTGTTCDFVFLRSNIEWLSKAINWEKFSATASLGVVYKGHVNESFMVLSTHLPYNDVS  | 567  |
| pcRPN2        | SNSAISGEGTNGV-KSBNTEQDAQKENSQSSNTEQAQDSEGDSAMPSTAVN---TDDKMAKDNEEKDRIPEDVLMVYVNEQHLEKMKLLIHLTGKIPSTLYIEFLHRNHADLILLDTYKNIIVDSRSSITHHGIVIAHALMQTGTTCDFVFLRSNIEWLSKAINWEKFSATASLGVVYKGHVNESFMVLSTHLPYNDVS        | 611  |
| pfRPN2        | SNAIITNEQQDENNNEKEDKDNNDGKNPEHNDNNKPNDLTNDEPTYNNDDKAINDGNDNNDNNNNNNNNNNIIVEDVLKYISKKHIFYNKMKLLYILTGVKVTGNLYIEFLHRNHADLILLDTYKNIIVDSRSSITHHGIVIAHALMQTGTTCDFVFLRSNIEWLSKAINWEKFSATASLGVVYKGHVNESFMVLSTHLPYNDVS  | 567  |
| chimeric_RPN2 | SNAIITNEQQDENNNEKEDKDNNDGKNPEHNDNNKPNDLTNDEPTYNNDDKAINDGNDNNDNNNNNNNNNNIIVEDVLKYISKKHIFYNKMKLLYILTGVKVTGNLYIEFLHRNHADLILLDTYKNIIVDSRSSITHHGIVIAHALMQTGTTCDFVFLRSNIEWLSKAINWEKFSATASLGVVYKGHVNESFMVLSTHLPYNDVS  | 567  |
| Consensus     | TEIANNINVLAPSGVYSEGGSYALGLIHANYNTNDKKVKNYLSQLKSNMDEVLQHGCLGLGLVCLGDSNDENTYDELKAILYSDS AVAGE SAAYAIGLLKLGSGDDKCIDELLAYAHTQHEKITRACISILGFVMPQKEREADNLIIEELINDKDAIIRYGGMFTIALAYCGLSNYNKHVIKKLLHPSVSDVSDVRRAAVI    | 774  |
| pcRPN2        | ROIANNINANISQSDVYSEGGSYALGLIHANYNTNDKKVKNYLSQLKSNMDEVLQHGCLGLGLVCLGDSNDENTYDELKAILYSDS AVAGE SAAYAIGLLKLGSGDDKCIDELLAYAHTQHEKITRACISILGFVMPQKEREADNLIIEELINDKDAIIRYGGMFTIALAYCGLSNYNKHVIKKLLHPSVSDVSDVRRAAVI   | 818  |
| pfRPN2        | TEIANNINVLAPSGVYSEGGSYALGLIHANYNTNDKKVKNYLSQLKSNMDEVLQHGCLGLGLVCLGDSNDENTYDELKAILYSDS AVAGE SAAYAIGLLKLGSGDDKCIDELLAYAHTQHEKITRACISILGFVMPQKEREADNLIIEELINDKDAIIRYGGMFTIALAYCGLSNYNKHVIKKLLHPSVSDVSDVRRAAVI    | 774  |
| chimeric_RPN2 | TEIANNINVLAPSGVYSEGGSYALGLIHANYNTNDKKVKNYLSQLKSNMDEVLQHGCLGLGLVCLGDSNDENTYDELKAILYSDS AVAGE SAAYAIGLLKLGSGDDKCIDELLAYAHTQHEKITRACISILGFVMPQKEREADNLIIEELINDKDAIIRYGGMFTIALAYCGLSNYNKHVIKKLLHPSVSDVSDVRRAAVI    | 774  |
| Consensus     | ALGFVLCNTPAQVPMFNLNLLIESYNPHVRYGAALALGIACAATGNEEAVNMLPLLLTDTDFVFRQSAFISLGLIFQQSNENVNPFFKFKDEIMKILSDKHEDIIAKFGATVGLGLLDICGRNAISTFFTRRANIIRPQSAVGFCLFCQLWYWPFLIHMISLTFPLPTCLIGLTEDLKVKNFTIIST-KNOAFDYPFSLSKVKQEK | 980  |
| pcRPN2        | ALGFVLCNTPAQVPMFNLNLLIESYNPHVRYGAALALGIACAATGNEEAVNMLPLLLTDTDFVFRQSAFISLGLIFQQSNENVNPFFKFKDEIMKILSDKHEDIIAKFGATVGLGLLDICGRNAISTFFTRRANIIRPQSAVGFCLFCQLWYWPFLIHMISLTFPLPTCLIGLTEDLKVKNFTIIST-KNOAFDYPFSLSKVKQEK | 1024 |
| pfRPN2        | ALGFVLCNSFNQVPMFNLNLLIESYNPHVRYGAALALGIACAATGNEEAVNMLPLLLTDTDFVFRQSAFISLGLIFQQSNENVNPFFKFKDEIMKILSDKHEDIIAKFGATVGLGLLDICGRNAISTFFTRRANIIRPQSAVGFCLFCQLWYWPFLIHMISLTFPLPTCLIGLTEDLKVKNFTIIST-KNOAFDYPFSLSKVKQEK | 981  |
| chimeric_RPN2 | ALGFVLCNTPAQVPMFNLNLLIESYNPHVRYGAALALGIACAATGNEEAVNMLPLLLTDTDFVFRQSAFISLGLIFQQSNENVNPFFKFKDEIMKILSDKHEDIIAKFGATVGLGLLDICGRNAISTFFTRRANIIRPQSAVGFCLFCQLWYWPFLIHMISLTFPLPTCLIGLTEDLKVKNFTIIST-KNOAFDYPFSLSKVKQEK | 980  |
| Consensus     | KETVTAIILSTTDKRRSLKLRKQKNENKLTKEKNPQDDSSSVLSDGKSMKNLEILSTAATIGQSSHVSHAESVEGSANDENSNDHQNDANQFSQLQRIKSD-KSKSASL--SHATTVDMKNPCRVIKTQEKYIEYPPNSRFKPIISIRKSGFIMLSDTTPTEPFDIEPKLESGNKKEVPPPEPPTWKDEN                 | 1168 |
| pcRPN2        | KETVTAIILSTTDKRRSLKLRKQKNENKLTKEKNPQDDSSSVLSDGKSMKNLEILSTAATIGQSSHVSHAESVEGSANDENSNDHQNDANQFSQLQRIKSD-KSKSASL--SHATTVDMKNPCRVIKTQEKYIEYPPNSRFKPIISIRKSGFIMLSDTTPTEPFDIEPKLESGNKKEVPPPEPPTWKDEN                 | 1212 |
| pfRPN2        | KETVTAIILSTTDKRRSLKLRKQKNENKLTKEKNPQDDSSSVLSDGKSMKNLEILSTAATIGQSSHVSHAESVEGSANDENSNDHQNDANQFSQLQRIKSD-KSKSASL--SHATTVDMKNPCRVIKTQEKYIEYPPNSRFKPIISIRKSGFIMLSDTTPTEPFDIEPKLESGNKKEVPPPEPPTWKDEN                 | 1172 |
| chimeric_RPN2 | KETVTAIILSTTDKRRSLKLRKQKNENKLTKEKNPQDDSSSVLSDGKSMKNLEILSTAATIGQSSHVSHAESVEGSANDENSNDHQNDANQFSQLQRIKSD-KSKSASL--SHATTVDMKNPCRVIKTQEKYIEYPPNSRFKPIISIRKSGFIMLSDTTPTEPFDIEPKLESGNKKEVPPPEPPTWKDEN                 | 1168 |
